# Supplementary material for: Catalysis in Pickering emulsions
Source: Royal Society of Chemistry journal article supplement (doi:10.1039/d0sm01636e), 2020-01-01
Supplement: d0sm01636e1.pdf [file d0sm01636e1.pdf]

## ESI

### CATALYSIS IN PICKERING EMULSIONS

Ana Maria Bago Rodriguez\* and Bernard P. Binks\*

*Department of Chemistry, University of Hull, Hull. HU6 7RX. U.K.*

\*Proofs and correspondence to:

Professor B.P. Binks

[b.p.binks@hull.ac.uk](mailto:b.p.binks@hull.ac.uk)

Dr A.M. Bago Rodriguez

[a.bago-rodriguez@hull.ac.uk](mailto:a.bago-rodriguez@hull.ac.uk)

**Table S1.** Summary of published literature involving catalysis in various kinds of Pickering emulsions.

| Ref. | Liquid 1 | Liquid 2   | Particle emulsifier (size)                                                                                                                                     | Catalyst                                                       | Emulsion type | Chemical reaction                                                     | Comments                                                                                        |
|------|----------|------------|----------------------------------------------------------------------------------------------------------------------------------------------------------------|----------------------------------------------------------------|---------------|-----------------------------------------------------------------------|-------------------------------------------------------------------------------------------------|
| 25   | Water    | Isooctane  | SiO <sub>2</sub> nanoparticles hydrophobised <i>in situ</i> by <i>N,N</i> -dimethyldodecylamine (20 nm)                                                        | Lipase from <i>Candida rugosa</i>                              | o/w           | Hydrolysis of olive oil and esterification of octanol with oleic acid | Destabilisation/re-emulsification by bubbling N <sub>2</sub> and CO <sub>2</sub> , respectively |
| 26   | Water    | Heptane    | CALB <sup>a</sup> immobilised on polymeric nanoparticles prepared by copolymerization of styrene and glycidyl methacrylate (228 nm)                            |                                                                | o/w           | Esterification of hexanol with hexanoic acid                          | HIPE <sup>b</sup>                                                                               |
| 60   | Water    | Decane     | Mesoporous and non-porous SiO <sub>2</sub> modified with dimethyloctadecyl[3-(trimethoxysilyl)propyl]ammonium chloride or octadecyl trimethoxysilane (~100 nm) | Rh-TPPTS <sup>c</sup>                                          | o/w           | Hydroformylation of 1-octene                                          | -                                                                                               |
| 68   | Water    | 1-Dodecene | Hydrophilic SiO <sub>2</sub> (l = 100 nm, d = 20 nm) or hollow Halloysite <sup>d</sup> nanotubes (l = 800 nm, d = 50 nm)                                       | Rh-sulfonated 4,5-bis(diphenyl phosphino)-9,9-dimethylxanthene | o/w           | Hydroformylation of 1-dodecene                                        | -                                                                                               |
| 75   | Water    | Toluene    | Pd/triamine-octyl bifunctionalized hairy                                                                                                                       |                                                                | o/w           | Hydrogenation of                                                      | Protonation/deprotonati                                                                         |

|     |       |                     |                                                                                                                                                                                        |               |     |                                                                                                      |                                                                                                                                                                                                                                                 |
|-----|-------|---------------------|----------------------------------------------------------------------------------------------------------------------------------------------------------------------------------------|---------------|-----|------------------------------------------------------------------------------------------------------|-------------------------------------------------------------------------------------------------------------------------------------------------------------------------------------------------------------------------------------------------|
|     |       |                     | SiO <sub>2</sub> (250-350 nm)                                                                                                                                                          |               |     | styrene                                                                                              | on switches the wettability of the catalyst surface thus driving emulsion inversion (o/w to w/o)                                                                                                                                                |
| 76  | Water | 1-Methylnaphthalene | TiO <sub>2</sub> (14 nm)                                                                                                                                                               |               | o/w | Photocatalytic degradation of 1-methylnaphthalene                                                    | Photocatalytic degradation with UV light                                                                                                                                                                                                        |
| 78  | Water | Styrene             | Pd (2-6 nm)/graphitic carbon nitride sheets (g-C <sub>3</sub> N <sub>4</sub> )                                                                                                         |               | o/w | Hydrogenation of alkenes                                                                             | H <sub>2</sub> generated <i>in situ</i> from NH <sub>3</sub> BH <sub>3</sub>                                                                                                                                                                    |
| 79  | Water | Toluene             | Amino-functionalised TiO <sub>2</sub> (l = 20-45 nm, d = 10-15 nm)                                                                                                                     |               | o/w | Hydrogenation of styrene                                                                             | Destabilisation/re-emulsification by addition of HCl and NaOH, respectively                                                                                                                                                                     |
| 81  | Water | Hexadecane          | Cellulose nanofibers with aldehyde groups (ACNFs) (l. ~20 nm)                                                                                                                          | Pd, Pt and Au | o/w | Reduction of 4-nitrophenol and common dyes (methylene blue and methyl orange) with NaBH <sub>4</sub> | Nanoparticles are grown <i>in situ</i> on interfacial ACNFs layer through aldehyde induced reduction of [PdCl <sub>4</sub> ] <sup>2-</sup> , [AuCl <sub>4</sub> ] <sup>-</sup> or [PtCl <sub>6</sub> ] <sup>2-</sup> . Continuous flow reaction |
| 86  | Water | Decalin             | Pd/Janus nanoparticles (silica functionalised with aminopropyltriethoxysilane, APTES) (~20 nm)                                                                                         |               | o/w | Hydrogenation of benzaldehyde and glutaraldehyde                                                     | Phase-selective catalysis                                                                                                                                                                                                                       |
| 104 | Water | Toluene             | HDPA <sup>e</sup> -functionalized Fe <sub>2</sub> O <sub>3</sub> -MO <sub>x</sub> /Al <sub>2</sub> O <sub>3</sub> nanoparticles (M is either Mn, Co, Ni, Cu, Cr, Mo, V or Ti) (~80 nm) |               | o/w | Oxidation of toluene to benzaldehyde                                                                 | -                                                                                                                                                                                                                                               |
| 87  | Water | Bio-octanol         | TiO <sub>2</sub> particles modified with 3-                                                                                                                                            |               | o/w | Photocatalytic H <sub>2</sub>                                                                        | Reaction triggered with                                                                                                                                                                                                                         |

|     |       |                                      |                                                                                                                                                                                       |                                               |     |                                                                                            |                                                                                                                                                                         |
|-----|-------|--------------------------------------|---------------------------------------------------------------------------------------------------------------------------------------------------------------------------------------|-----------------------------------------------|-----|--------------------------------------------------------------------------------------------|-------------------------------------------------------------------------------------------------------------------------------------------------------------------------|
|     |       |                                      | (trimethoxysilyl)propyl methacrylate<br>(1.8 $\mu\text{m}$ )                                                                                                                          |                                               |     | production                                                                                 | light                                                                                                                                                                   |
| 98  | Water | Hexane                               | 8A PEG-CD <sup>f</sup> and<br>8A PEG-Fc <sup>g</sup> self-<br>assembled into<br>stimulated<br>microgels (~ 200<br>nm)                                                                 | Lipase from<br><i>Pseudomonas<br/>cepacia</i> | o/w | Hydrolysis of<br>triacetin and kinetic<br>resolution of ( <i>R,S</i> )-<br>1-phenylethanol | Fc is redox-active and<br>the electrochemical<br>response allows the<br>reversible formation and<br>deformation of the<br>microgels which affects<br>emulsion stability |
| 108 | Water | Heptane                              | Lipase from <i>Candida rugose</i> chemically<br>conjugated to polydopamine-modified<br>ZIF-8 <sup>h</sup> particles (50, 150 and 500 nm)                                              |                                               | o/w | Hydrolysis of <i>p</i> -<br>nitrophenyl<br>palmitate                                       | -                                                                                                                                                                       |
| 112 | Water | Toluene                              | Bare, metal-<br>functionalised and<br>magnetic-<br>functionalised<br>porous hollow<br>carbonaceous<br>spheres<br>synthesized from<br><i>S. Cerevisiae</i> cells<br>(2 $\mu\text{m}$ ) | Sodium sulphide,<br>NaBH <sub>4</sub>         | o/w | Reduction of <i>p</i> -<br>nitroanisole                                                    | Destabilisation/re-<br>emulsification is pH-<br>and magnetic field-<br>dependent                                                                                        |
| 113 | Water | Decanol                              | Au/PEO <sup>i</sup> -b-P4VP <sup>j</sup> hybrid micelles (56<br>nm)                                                                                                                   |                                               | o/w | Reduction of <i>p</i> -<br>nitroanisole to <i>p</i> -<br>anisidine                         | Destabilisation/re-<br>emulsification by<br>addition of HCl and<br>NaOH, respectively                                                                                   |
| 80  | Water | Various<br>aliphatic<br>hydrocarbons | MgO (300-400 nm or 1300-2900 nm)                                                                                                                                                      |                                               | o/w | Knoevenagel<br>condensation<br>reaction                                                    | Emulsion stability and<br>catalytic activity of<br>MgO were affected by<br>method of preparation,<br>calcination temp. and                                              |

|     |                  |                           |                                                                                                                                                           |                                |     | nature of oil                                                                                 |                                                                                                         |
|-----|------------------|---------------------------|-----------------------------------------------------------------------------------------------------------------------------------------------------------|--------------------------------|-----|-----------------------------------------------------------------------------------------------|---------------------------------------------------------------------------------------------------------|
| 88  | Water            | Various                   | Cellulose nanocrystals partially modified with alkyl chains (Janus particles) decorated with Pd (~ 1 μm)                                                  |                                | o/w | Hydrogenation of nitrobenzene and Suzuki coupling                                             | -                                                                                                       |
| 105 | Water            | Bromooctane               | Graphene oxide grafted with polyethylene glycol (PEG) and 3-aminopropyltriethoxysilane (APS)                                                              |                                | o/w | Production of iodoctane from bromooctane and NaI (nucleophilic substitutions)                 | -                                                                                                       |
| 20  | Water            | Decalin                   | Pd/carbon nanotube-inorganic oxide hybrid nanoparticles (~100 nm)                                                                                         |                                | w/o | Hydrodeoxygenation of a phenolic compound and hydrogenation and etherification of an aldehyde | Consecutive reaction: sequence of Pd-catalysed hydrogenation paired with a preceding aldol condensation |
| 15  | Phosphate buffer | Hexane                    | Partially hydrophobic SiO <sub>2</sub> modified with methyltrimethoxysilane (40-60 nm)                                                                    | CALB <sup>a</sup>              | w/o | Hydrolysis kinetic resolution of racemic esters                                               | -                                                                                                       |
| 22  | Phosphate buffer | Toluene                   | Hydrophobic SiO <sub>2</sub> nanoparticles (50, 120 and 230 nm) and mesoporous silica particles (120 nm)                                                  | Lipase from <i>Candida sp.</i> | w/o | Esterification reaction between 1-hexanol and hexanoic acid                                   | Cross-linking of particles at droplet interface with TEOS <sup>k</sup>                                  |
| 49  | Phosphate buffer | Paraffin oil              | Lipase from <i>Pseudomonas cepacia</i> immobilized on mesoporous SiO <sub>2</sub> (350-450 nm) modified with silylating agents of different chain lengths |                                | w/o | Tributylin hydrolysis                                                                         | Emulsion prepared with particles of intermediate wettability displayed highest stability and conversion |
| 54  | Water            | Cyclopentyl methyl ether, | SiO <sub>2</sub> (20 nm)                                                                                                                                  | CALA <sup>l</sup>              | w/o | Transesterification of 1-phenyl ethanol                                                       | Continuous flow reaction                                                                                |

|    |                  |                                    |                                                                                                           |                                                                                                          |     |                                                                                                     |                                                                   |
|----|------------------|------------------------------------|-----------------------------------------------------------------------------------------------------------|----------------------------------------------------------------------------------------------------------|-----|-----------------------------------------------------------------------------------------------------|-------------------------------------------------------------------|
|    |                  | methyl tert-butyl ether or toluene |                                                                                                           |                                                                                                          |     | with vinyl butyrate                                                                                 |                                                                   |
| 55 | Water            | Toluene                            | Partially hydrophobic SiO <sub>2</sub> modified with methyltrimethoxysilane (40-60 nm)                    | Various: H <sub>2</sub> SO <sub>4</sub> , HPA <sup>m</sup> and CALB <sup>a</sup>                         | w/o | Addition reaction, ring opening of an epoxide, kinetic resolution of racemic esters                 | Continuous flow reaction                                          |
| 56 | Water            | Heptane or methyl tert-butyl ether | SiO <sub>2</sub> hydrophobized with TMODS <sup>n</sup> (140 nm)                                           | CALA, <sup>l</sup> CALB <sup>a</sup> and benzaldehyde lyase from <i>Pseudomonas fluorescens</i> Boivar I | w/o | Esterification of 1-octanol and octanoic acid and stereoselective condensation of benzoin           | -                                                                 |
| 57 | Water            | Heptane or dodecane                | Fe <sub>3</sub> O <sub>4</sub> on SiO <sub>2</sub> (~220 nm)                                              | Lipase from <i>Candida sp.</i> expressed in <i>Aspergillus niger</i>                                     | w/o | Esterification of 1-hexanol with hexanoic acid                                                      | -                                                                 |
| 58 | Water            | Toluene                            | Polymersomes (200-500 nm)                                                                                 | CALB <sup>a</sup>                                                                                        | w/o | Esterification of 1-hexanol and hexanoic acid                                                       | -                                                                 |
|    |                  |                                    | Polymersomes containing CALB <sup>a</sup> (200-500 nm)                                                    |                                                                                                          |     |                                                                                                     |                                                                   |
| 59 | Phosphate buffer | Toluene                            | Lipase from <i>Candida sp.</i> immobilized onto periodic mesoporous organosilica (1.5 μm)                 |                                                                                                          | w/o | Esterification of oleic acid with ethanol                                                           | -                                                                 |
| 61 | Phosphate buffer | Hexane                             | Mesoporous SiO <sub>2</sub> containing either lysozyme or lipase from <i>Pseudomonas cepacia</i> (2-6 μm) |                                                                                                          | w/o | Hydrolysis of triacetin and kinetic resolution of ( <i>R,S</i> )-1-phenylethanol with vinyl acetate | Recyclability is not ideal as activity decreases after each cycle |
| 62 | Phosphate        | Cyclohexane                        | CALB <sup>a</sup> immobilised on SiO <sub>2</sub>                                                         |                                                                                                          | w/o | Esterification and                                                                                  | -                                                                 |

|    |                                                                    |               |                                                                                                                                                                                                                                                                       |                                                                        |     |                                                                                                                                                           |                                                                                       |
|----|--------------------------------------------------------------------|---------------|-----------------------------------------------------------------------------------------------------------------------------------------------------------------------------------------------------------------------------------------------------------------------|------------------------------------------------------------------------|-----|-----------------------------------------------------------------------------------------------------------------------------------------------------------|---------------------------------------------------------------------------------------|
|    | buffer                                                             |               | nanoflowers modified with DCDMS <sup>o</sup><br>(500 nm)                                                                                                                                                                                                              |                                                                        |     | transesterification<br>for biodiesel<br>production                                                                                                        |                                                                                       |
| 63 | Water                                                              | Decalin       | Zeolite modified with OTS <sup>p</sup> (~500 nm)                                                                                                                                                                                                                      |                                                                        | w/o | Alkylation of <i>m</i> -<br>cresol with 2-<br>propanol                                                                                                    | -                                                                                     |
| 65 | Water                                                              | Toluene       | Partially<br>hydrophobic SiO <sub>2</sub><br>(40-60 nm)                                                                                                                                                                                                               | H <sub>3</sub> PW <sub>12</sub> O <sub>40</sub><br>(HPA <sup>m</sup> ) | w/o | Cyclization of<br>citronellal                                                                                                                             | Continuous flow<br>reaction                                                           |
| 66 | Water                                                              | Toluene       | Partially<br>hydrophobic SiO <sub>2</sub><br>modified with<br>methyltrimethoxys<br>ilane (130-200 nm)                                                                                                                                                                 | HCl and NaBH <sub>4</sub>                                              | w/o | Deacetalization-<br>reduction,<br>deacetalization –<br>Knoevenagel,<br>deacetalization–He<br>nry and<br>diazotization–iodiz<br>ation cascade<br>reactions | Cascade reactions                                                                     |
| 67 | H <sub>2</sub> SO <sub>4</sub> and<br>EDA <sup>q</sup> in<br>water | Toluene       | SiO <sub>2</sub> modified<br>with<br>methyltrimethoxys<br>ilane (60-80 nm)                                                                                                                                                                                            | H <sub>2</sub> SO <sub>4</sub> , EDA <sup>q</sup>                      | w/o | Deacetalization-<br>Knoevenagel<br>cascade reaction                                                                                                       | Sol-gel process with<br>TMOS <sup>f</sup> to reinforce<br>droplets                    |
| 69 | Water                                                              | Ethyl acetate | Pd on SiO <sub>2</sub> modified with<br>(MeO) <sub>3</sub> SiCH <sub>2</sub> CH <sub>2</sub> CH <sub>2</sub> (NHCH <sub>2</sub> CH <sub>2</sub> ) <sub>2</sub> NH<br><sub>2</sub> and (MeO) <sub>3</sub> Si(CH <sub>2</sub> ) <sub>7</sub> CH <sub>3</sub> (50-60 nm) |                                                                        | w/o | Hydrogenation of<br>unsaturated<br>compounds                                                                                                              | Destabilisation/re-<br>emulsification by<br>addition of HCl and<br>NaOH, respectively |
| 71 | Water                                                              | Decalin       | Pd/Al <sub>2</sub> O <sub>3</sub> coated with organophosphonic<br>acids of various alkyl chain lengths (size<br>not given)                                                                                                                                            |                                                                        | w/o | Vanillin<br>hydrodeoxygenatio<br>n                                                                                                                        | -                                                                                     |

|    |                                      |                                  |                                                                                                                                                                     |                                                        |     |                                                                      |                                                                                                                   |
|----|--------------------------------------|----------------------------------|---------------------------------------------------------------------------------------------------------------------------------------------------------------------|--------------------------------------------------------|-----|----------------------------------------------------------------------|-------------------------------------------------------------------------------------------------------------------|
| 72 | Water                                | Cinnamaldehyde                   | Pd(8-10 nm)/silicane-functionalised graphene oxide (size not given)                                                                                                 |                                                        | w/o | Selective hydrogenation of cinnamaldehyde to hydrocinnamaldehyde     | -                                                                                                                 |
| 73 | Water                                | Toluene                          | [C <sub>18</sub> /SO <sub>3</sub> H]@SiO <sub>2</sub> (15 nm) and [C <sub>12</sub> ] <sub>3</sub> [PW <sub>12</sub> O <sub>40</sub> ] <sup>s</sup> (35 nm) mixtures |                                                        | w/o | Oxidative cleavage of cyclohexene oxide for synthesis of adipic acid | One-pot reaction. Other cycloalkene oxides, nanoparticles and organic solvents also tested                        |
| 74 | Water                                | Decalin                          | Rh/carbon nanotubes (l = 1-2 μm, d = 10-20 nm)                                                                                                                      |                                                        | w/o | Hydrodeoxygenation of vanillin                                       | -                                                                                                                 |
| 16 | Water                                | Toluene                          | Pd/triamine-octyl-bifunctionalized SiO <sub>2</sub> (250-350 nm)                                                                                                    |                                                        | w/o | Reduction of <i>m</i> -nitrotoluene                                  | -                                                                                                                 |
| 77 | Water                                | Toluene                          | Pd loaded onto carbon spheres (160 nm)                                                                                                                              |                                                        | w/o | Hydrogenation of unsaturated aromatic compounds                      | -                                                                                                                 |
| 90 | Tris-HCl buffer                      | Hexane                           | Lipase-immobilized alginate microparticles coated with silanized TiO <sub>2</sub> nanoparticles (2-5 μm)                                                            |                                                        | w/o | Esterification of hexanoic acid and 1-hexanol                        | Microparticles prepared through alginate gelation <i>via</i> coalescence of two w/o emulsions                     |
| 83 | Water                                | Isooctane                        | Multi-walled carbon nanotubes (w. ~200 nm), graphene and Ag <sub>3</sub> PO <sub>4</sub> (~80 nm)/BiPO <sub>4</sub> (l. ~200 nm, d. ~80 nm) composites              |                                                        | w/o | Photocatalytic degradation of Blue 92 dye                            | -                                                                                                                 |
| 99 | Triethanolamine hydrochloride buffer | Methyl- <i>tert</i> -butyl ether | Negatively charged P(NiPAM- <i>co</i> -MAA) <sup>t</sup> microgel, copolymer                                                                                        | Alcohol dehydrogenase from <i>Lactobacillus brevis</i> | w/o | Reduction of acetophenone to ( <i>R</i> )-phenylethanol              | Destabilisation by increasing temperature above VPTT <sup>v</sup> of microgel. The coupled reaction of 2-propanol |



|     |                                               |          |                                                                                                                                                       |                                                                                                           |             |                                                                                 |                                                                                   |
|-----|-----------------------------------------------|----------|-------------------------------------------------------------------------------------------------------------------------------------------------------|-----------------------------------------------------------------------------------------------------------|-------------|---------------------------------------------------------------------------------|-----------------------------------------------------------------------------------|
|     |                                               |          | P(NiPAM- <i>co</i> -NiPMAM) <sup>u</sup> microgel and PNiPAM-NiPMAM core-shell microgel (200 nm in swollen state)                                     |                                                                                                           |             |                                                                                 | to acetone is used to regenerate the co-factor NADPH                              |
| 100 | Water                                         | Toluene  | SiO <sub>2</sub> (~ 10 nm) and PDEAEMA <sup>w</sup> microgel containing lipase from <i>Candida sp.</i> expressed in <i>Aspergillus niger</i> (1-2 μm) |                                                                                                           | w/o         | Esterification of 1-hexanol with hexanoic acid                                  | pH change induces swelling/shrinking of microgel                                  |
| 116 | Water                                         | Decalin  | Metal (Pd, Pt, Ni) oxides fused to functionalized carbon nanotubes (1. ~ 100 nm)                                                                      |                                                                                                           | w/o         | Simultaneous condensation and hydrogenation of short biomass-derived oxygenates | Multi-step reaction                                                               |
| 30  | Water                                         | Toluene  | Titanate nanotubes modified with CH <sub>3</sub> Si(OCH <sub>3</sub> ) <sub>3</sub> (l. 100 – 400 nm, w. 4 – 7 nm)                                    | Titanate nanotubes containing Ru nanoparticles (2 – 3 nm) in the interior of the hollow tubular structure | w/o         | Selective hydrogenation of α,β-unsaturated aldehydes                            | -                                                                                 |
| 21  | ZnSO <sub>4</sub> ·7H <sub>2</sub> O in water | Benzene  | TiO <sub>2</sub> nanoparticles modified with (MeO) <sub>3</sub> SiCH <sub>3</sub> (21 nm)                                                             | Ru/TiO <sub>2</sub>                                                                                       | o/w and w/o | Selective hydrogenation of benzene to cyclohexene                               | Impact of emulsion type, droplet diameter, inter-droplet distance and temperature |
| 29  | Phosphate buffer                              | Dodecane | SiO <sub>2</sub> particles of various hydrophilicities (20 nm)                                                                                        | Aldoxime dehydratase (OxdB)                                                                               | o/w and w/o | Dehydration of <i>n</i> -octanaloxime                                           | Compared reaction rate and extent in both emulsion types                          |

|     |       |                          |                                                                                                                                                                                                                      | overexpressed in <i>E. coli</i> |             |                                                                                                                                                                                                        |                                                                                    |
|-----|-------|--------------------------|----------------------------------------------------------------------------------------------------------------------------------------------------------------------------------------------------------------------|---------------------------------|-------------|--------------------------------------------------------------------------------------------------------------------------------------------------------------------------------------------------------|------------------------------------------------------------------------------------|
| 50  | Water | Decalin                  | Pd/carbonaceous microspheres (1.5-2.5 $\mu\text{m}$ )                                                                                                                                                                |                                 | o/w or w/o  | Hydrodeoxygenation of vanillin                                                                                                                                                                         | -                                                                                  |
| 107 | Water | Cyclopentyl methyl ether | P(NIPAM) polymer grown on enzyme (various)                                                                                                                                                                           |                                 | o/w and w/o | Benzoin condensation reaction between two benzaldehyde molecules, generation of $\text{H}_2\text{O}_2$ from glucose and subsequent production of methyl pentyl sulfoxide and production of cyclohexene | Various cascade reactions                                                          |
| 109 | Water | Toluene                  | <i>Alcaligenes faecalis</i> cells coated with porous calcium phosphate mineral shell and $\text{Fe}_3\text{O}_4$ nanoparticles. Sodium monododecyl phosphate then adsorbed on mineral shell ( $\sim 5 \mu\text{m}$ ) |                                 | o/w and w/o | Hydrolysis of hydrophobic ( <i>R,S</i> )-mandelonitrile to hydrophilic <i>R</i> -(-)-mandelic acid                                                                                                     | Magnetically-controlled reversible disassembly/assembly of particles at interfaces |
| 110 | Water | Various organic solvents | Dendrimer-like mesoporous $\text{SiO}_2$ modified with octyl, amino and thiol groups containing different catalytic groups (peptide, metal complex and DNAzymes) (90 nm)                                             |                                 | o/w and w/o | Hydrolysis of <i>p</i> -nitrophenyl butyrate, $\text{H}_2\text{O}_2$ oxidation of (2-chloroethyl)ethyl sulfide                                                                                         | -                                                                                  |
| 114 | Water | Dichloromethane          | TEMPO <sup>x</sup> immobilised in P((TMA-co-DMA)- <i>b</i> -MMA) <sup>y</sup> or in P(TMA- <i>b</i> -MMA) <sup>z</sup> (20-90 nm)                                                                                    |                                 | w/o and o/w | Alcohol oxidation                                                                                                                                                                                      | Destabilisation/re-emulsification by addition of $\text{CO}_2$ and $\text{N}_2$    |

|     |                           |                                              |                                                                                                                    |                   |                       |                                                                                            |                          |
|-----|---------------------------|----------------------------------------------|--------------------------------------------------------------------------------------------------------------------|-------------------|-----------------------|--------------------------------------------------------------------------------------------|--------------------------|
|     |                           |                                              |                                                                                                                    |                   |                       |                                                                                            | respectively             |
| 101 | Water                     | Various oils                                 | Lipase from <i>Candida rugosa</i> adsorbed on chitosan nanogel (~ 50 nm)                                           |                   | o/w and w/o           | Hydrolysis of <i>p</i> -nitrophenyl palmitate and triglycerides                            | -                        |
| 84  | Water                     | Dodecane                                     | Ni/carbon nanotubes (7.4 nm)                                                                                       |                   | o/w and w/o           | Hydrogenation of furfural                                                                  | -                        |
| 36  | Aqueous dextran (500 kDa) | Aqueous polyethylene glycol (PEG, 8 kDa)     | Methoxy PEG-urease conjugate particles (200-500 nm)                                                                |                   | Dextran-rich/PEG-rich | Hydrolysis of urea to ammonium carbonate                                                   | -                        |
|     |                           |                                              | Denatured methoxy PEG-urease conjugate particles (200-500 nm)                                                      | Urease            |                       |                                                                                            |                          |
| 37  | Aqueous dextran (10 kDa)  | Aqueous PEG (8 kDa)                          | Clay particles (kaolinite, montmorillonite and illite) (0.5-1.6 μm)                                                |                   | Dextran-rich/PEG-rich | Reaction of <i>o</i> -phenylenediamine with hydrogen peroxide to form 2,3-diaminophenazone | -                        |
| 38  | Aqueous dextran (10 kDa)  | Aqueous PEG (8 kDa)                          | PEGylated liposomes (~130 nm)                                                                                      |                   | Dextran-rich/PEG-rich | Ribozyme cleavage using a two-piece hammerhead ribozyme                                    | -                        |
| 48  | 1-Dodecene                | [BMIM]BF <sub>4</sub> <sup>aa</sup> or water | Non-porous and dendritic mesoporous SiO <sub>2</sub> modified with C18N <sup>ab</sup> (~ 100 nm)                   | Rh-sulfo-xantphos | IL/o and w/o          | Hydroformylation of 1-dodecene                                                             | Continuous flow reaction |
| 43  | Toluene                   | [BMIM]BF <sub>4</sub> <sup>aa</sup>          | H <sub>3</sub> PW <sub>12</sub> O <sub>40</sub> (HPA <sup>m</sup> ) immobilised on poly(1-vinyl-3-ethylimidazolium |                   | IL/o                  | Acylation of toluene with acetic                                                           | Continuous flow reaction |

|    |                                                                                         |                                      |                                                                                                   |                                                                                         |                                      |                                                                                              |                                                                                                                      |
|----|-----------------------------------------------------------------------------------------|--------------------------------------|---------------------------------------------------------------------------------------------------|-----------------------------------------------------------------------------------------|--------------------------------------|----------------------------------------------------------------------------------------------|----------------------------------------------------------------------------------------------------------------------|
|    |                                                                                         |                                      | bromide) functionalised silica@PS <sup>ac</sup> /PDVB <sup>ad</sup> Janus particles (500 nm)      |                                                                                         |                                      | anhydride                                                                                    |                                                                                                                      |
| 45 | [BMIM]BF <sub>4</sub> <sup>aa</sup>                                                     | TMSCN <sup>ae</sup> in octane        | Hydrophobic SiO <sub>2</sub> (40-60 nm)                                                           | [BMIM]Cl <sup>af</sup>                                                                  | IL/o                                 | Cyanosilylation of carbonyl compounds                                                        | Continuous flow reaction                                                                                             |
| 46 | [BMIM]PF <sub>6</sub> <sup>ag</sup><br>[BMIM]BF <sub>4</sub> <sup>aa</sup><br>and water | Octane                               | Hydrophobic SiO <sub>2</sub> (20 nm)                                                              | Various:<br>CALB, <sup>a</sup><br>Cr <sup>III</sup> (salen),<br>[Pd(OAc) <sub>2</sub> ] | IL/o                                 | Kinetic resolution of alcohols, asymmetric ring opening of epoxides and Tsuji-Trost reaction | Interfacial sol-gel process to grow a crust around IL droplets after emulsion preparation. Continuous flow reactions |
| 47 | Octane                                                                                  | [BIMIM]PF <sub>6</sub> <sup>aa</sup> | DCDMS <sup>o</sup> -modified SiO <sub>2</sub> (40-60 nm)                                          | CALB <sup>a</sup><br>(also CuI)                                                         | IL/o                                 | Enantioselective trans-esterification of alcohols (also azide-alkyne cycloaddition)          | Continuous flow reaction                                                                                             |
| 51 | Dodecyl aldehyde                                                                        | Ethylene glycol                      | Activated charcoal functionalized with phenyl sulfonic groups (10 μm)                             |                                                                                         | Dodecyl aldehyde/e<br>thylene glycol | Acetalization of dodecyl aldehyde with ethylene glycol                                       | Multistep reaction <i>via</i> hemiacetal intermediate                                                                |
| 52 | Glycerol (g)                                                                            | Dodecanol (d)                        | PS <sup>ac</sup> -grafted SiO <sub>2</sub> bearing sulfonic acid centers (45-79 nm)               |                                                                                         | g/d, d/g<br>and d/g/d                | Etherification reaction of glycerol with dodecanol                                           | Dodecanol conversion lower in d/g emulsions than in d/g/d and selected g/d emulsions                                 |
| 53 | Vegetable oil                                                                           | Methanol (MeOH)                      | SiO <sub>2</sub> functionalised with alkyl chains and active propylsulfonic acid residues (~7 nm) |                                                                                         | MeOH/o                               | Transesterification of vegetable oils with MeOH                                              | -                                                                                                                    |
| 70 | 1-dodecyl aldehyde                                                                      | Ethylene glycol                      | Amphiphilic SiO <sub>2</sub> bearing alkyl and propylsulfonic acid groups (150-300 nm)            |                                                                                         | Dodecyl aldehyde/e<br>thylene        | Acetalization of immiscible long chain fatty                                                 | -                                                                                                                    |

|     |                 |               |                                                                                                                                       |                           |                                                              |                                                                                        |
|-----|-----------------|---------------|---------------------------------------------------------------------------------------------------------------------------------------|---------------------------|--------------------------------------------------------------|----------------------------------------------------------------------------------------|
|     |                 |               |                                                                                                                                       | glycol                    | aldehydes with ethylene glycol                               |                                                                                        |
| 23  | Ethylene glycol | Dodecanal     | SiO <sub>2</sub> nanoparticles modified with propylsulfonic acid groups and octyl chains (90-460 nm) with different surface roughness | Ethylene glycol/dodecanal | Acetalization reaction between dodecanal and ethylene glycol | -                                                                                      |
| 115 | Water           | Ethyl acetate | Au nanoclusters/Sodium caseinate (micelles, 20-40 nm)                                                                                 | Ethyl acetate/w           | Hydrogenation of p-nitroaniline                              | Emulsification/demulsification is pH dependent. Cyclability maintained over 100 cycles |

- <sup>a</sup> CALB: *Candida Antarctica* lipase B
- <sup>b</sup> HIPE: High internal phase emulsion
- <sup>c</sup> Rh-TPPTS: Rhodium-tris(m-sulfonatophenyl) phosphine
- <sup>d</sup> Halloysite: Natural clay. Aluminosilicates with a molecular formula of  $\text{Al}_2\text{Si}_2\text{O}_5(\text{OH})_4 \cdot n\text{H}_2\text{O}$ . These have a tubular shape with silica tetrahedra outside and aluminium oxide octahedra inside
- <sup>e</sup> HDP A: Hexadecylphosphate acid
- <sup>f</sup> 8A PEG-CD: Cyclodextrin functionalized 8-arm poly(ethylene glycol)
- <sup>g</sup> 8A PEG-Fc: Ferrocene functionalized 8-arm poly(ethylene glycol)
- <sup>h</sup> ZIF-8: Zeolitic-imidazolate framework-8
- <sup>i</sup> PEO: Poly(ethylene oxide)
- <sup>j</sup> P4VP: Poly(4-vinylpyridine)
- <sup>k</sup> TEOS: Tetraethyl orthosilicate
- <sup>l</sup> CALA: *Candida Antarctica* lipase A
- <sup>m</sup> HPA: Heteropolyacid
- <sup>n</sup> TMODS: Trimethoxy(octadecyl)silane
- <sup>o</sup> DCDMS: Dichlorodimethylsilane
- <sup>p</sup> OTS: Octadecyltrichlorosilane
- <sup>q</sup> EDA: Ethylenediamine
- <sup>r</sup> TMOS: Tetramethoxysilane

<sup>s</sup> [C<sub>12</sub>]<sub>3</sub>[PW<sub>12</sub>O<sub>40</sub>]: Dodecyltrimethylammonium phosphotungstate

<sup>t</sup> P(NiPAM-*co*-MAA): Poly(*N*-isopropylacrylamide-*co*-methacrylic acid)

<sup>u</sup> P(NiPAM-*co*-NiPMAM): Poly(*N*-isopropylacrylamide-*co*-*N*-isopropylmethacrylamide) copolymer

<sup>v</sup> VPTT: Volume phase transition temperature

<sup>w</sup> PDEAEMA: Poly(2-(diethylamino)ethyl methacrylate)

<sup>x</sup> TEMPO: 2,2,6,6-Tetramethylpiperidine-1-oxyl

<sup>y</sup> P((TMA-*co*-DMA)-*b*-MMA): poly((2,2,6,6-tetramethylpiperidine-1-oxyl-4-methacrylate-*co*-(2-(dimethylamino) ethyl methacrylate))-*b*-methyl methacrylate)

<sup>z</sup> P(TMA-*b*-MMA): poly(2,2,6,6-tetramethylpiperidine-1-oxyl-4-methacrylate-*b*-methyl methacrylate)

<sup>aa</sup> [BMIM]BF<sub>4</sub>: 1-Butyl-3-methylimidazolium tetrafluoroborate

<sup>ab</sup> C18N: Dimethyloctadecyl[3-(trimethoxysilyl)propyl] ammonium chloride

<sup>ac</sup> PS: Polystyrene

<sup>ad</sup> PDVB: Polydivinylbenzene

<sup>ae</sup> TMSCN: Trimethylsilyl cyanide

<sup>af</sup> [BMIM]Cl: 1-Butyl-3-methylimidazolium chloride

<sup>ag</sup> [BMIM]PF<sub>6</sub>: 1-Butyl-3-methylimidazolium hexafluorophosphate
